# Supplementary material for: Interdecadal Changes of the MERRA-2 Incoming Surface Solar Radiation (SSR) and Evaluation against GEBA & BSRN Stations
Source: MDPI journal article supplement (doi:10.3390/app121910176), 2022-10-10
Supplement: s1 [file s1]

Archive with 1 entries (1 files):
- applsci-1920433-supplementary.pdf
